# Supplementary material
Source: HighWire-hosted journal article supplement (https://www.cmaj.ca/highwire/filestream/58047/field_highwire_adjunct_files/0/work-dionne-online_appendix.pdf)
Supplement: work-dionne-online_appendix.pdf [file work-dionne-online_appendix.pdf]

**e-Appendix: Summary of the standardized instruments used to measure key constructs in subjects with nonspecific back pain that has caused work absence**

| Measurement                                                      | Instrument used                                                                                | No. of items           | Scoring range                 | Index of reliability or validity*                        |
|------------------------------------------------------------------|------------------------------------------------------------------------------------------------|------------------------|-------------------------------|----------------------------------------------------------|
| Back-related functional limitations                              | Roland–Morris Disability Questionnaire <sup>1–6</sup>                                          | 24                     | 0 to 100                      | Construct validity:<br>r = 0.78–0.89                     |
| Pain levels: current, worst in past 6 mo, average over past 6 mo | 11-point numerical rating scale <sup>7,8</sup>                                                 | 3                      | 0 to 10 each                  | r = 0.90                                                 |
| Psychological distress                                           | Symptom Checklist-90 Revised <sup>9–14</sup>                                                   |                        | 0 to 4 each                   | Internal consistency:<br>Cronbach's $\alpha$ = 0.77–0.90 |
| Depression                                                       |                                                                                                | 10                     |                               |                                                          |
| Somatization                                                     |                                                                                                | 7                      |                               |                                                          |
| Fear-avoidance beliefs                                           | Fear-Avoidance Beliefs Questionnaire <sup>15,16</sup>                                          |                        |                               | Test–retest reproducibility:<br>Cohen's $\kappa$ = 0.74  |
| In general activities                                            |                                                                                                | 5                      | 0 to 30                       |                                                          |
| At work                                                          |                                                                                                | 11                     | 0 to 66                       |                                                          |
| At work:                                                         |                                                                                                |                        |                               | <i>Internal consistency:</i>                             |
| Psychological demands                                            | Karasek's Job Content Questionnaire <sup>17,18</sup>                                           | 9                      | –6 to 21                      | Cronbach's $\alpha$ = 0.73–0.74                          |
| Decision latitude                                                | Karasek's Job Content Questionnaire <sup>17,18</sup>                                           | 9                      | 24 to 96                      | Cronbach's $\alpha$ = 0.81–0.83                          |
| Social support                                                   | Modified work APGAR <sup>19–24</sup>                                                           | 7                      | 7 to 21                       | Cronbach's $\alpha$ = 0.86                               |
| Effort–reward imbalance                                          | Items drawn from Siegrist's questionnaire <sup>25,26</sup>                                     | 2                      | 1 to 4 each                   | Cronbach's $\alpha$ > 0.70                               |
| Characteristics of the patient–physician encounter               | Questions drawn from the work of Cherkin et al <sup>27</sup> and Von Korff et al <sup>28</sup> | 13                     | 0 to 10 each                  | Unavailable                                              |
| Coping strategies for pain                                       | Items drawn from the Pain Coping Strategies Questionnaire <sup>29</sup>                        | 7                      | 0 to 10 each                  | Unavailable                                              |
| Dramatization of diagnosis                                       | Items adapted from the work of Cedraschi et al <sup>30</sup>                                   | 4                      | Yes/No                        | Unavailable                                              |
| Self-efficacy                                                    | Scale developed by Dionne and Nouwen <sup>31</sup>                                             | 8                      | 0 to 100                      | Cronbach's $\alpha$ = 0.88                               |
| Health locus of control (internal, external, chance)             | Multidimensional Health Locus of Control Scales <sup>32,33</sup>                               | Int 6<br>Ext 6<br>Ch 6 | 6 to 36<br>6 to 36<br>6 to 36 | Cronbach's $\alpha$ > 0.72                               |

Note: APGAR = adaptability, partnership, growth, affection and resolve (index), Int = internal, Ext = external, Ch = chance.

\*Information about the psychometric qualities of questionnaires is given with the understanding that its interpretation, particularly with respect to instrument validity, requires additional methodological detail.

1. Roland M, Morris R. A study of the natural history of back pain. Part I: development of a reliable and sensitive measure of disability in low-back pain. *Spine* 1983;8(2):141-4.
2. Waddell G. The back pain revolution. Edinburgh: Churchill Livingstone; 1998. p. 39-40.
3. Jensen MP, Strom SE, Turner JA, Romano JM. Validity of the Sickness Impact Profile Roland Scale as a measure of dysfunction in chronic pain patients. *Pain* 1992;50(2):157-62.
4. Beurskens AJ, de Vet HC, Koke AJ, van der Heijden GJ, Knipschild PG. Measuring the functional status of patients with low back pain: assessment of the quality of four disease-specific questionnaires. *Spine* 1995;20(9):1017-28.
5. Roland M, Fairbank J. The Roland–Morris Disability Questionnaire and the Oswestry Disability Questionnaire. *Spine* 2000;25(24):3115-24.
6. Riddle DL, Stratford PW, Binkley JM. Sensitivity to change of the Roland–Morris Back Pain Questionnaire: part 2. *Phys Ther* 1998;78(11):1197-207.
7. Bolton JE. Accuracy of recall of usual pain intensity in back pain patients. *Pain* 1999;83(3):533-9.
8. Strong J, Ashton R, Chant D. Pain intensity measurement in chronic low back pain. *Clin J Pain* 1991;7(3):209-18.
9. Derogatis LR. Symptoms Checklist-90. Administration, scoring and procedures manual for the revised version. Baltimore: Clinical Psychometric Research; 1977.
10. Dionne CE, Bourbonnais R, Frémont P, et al. Predictors of return to work in good health among back pain patients in primary care settings: 3-month outcome in the RAMS-Prognosis Study [abstract]. International Forum V on Primary Care Research on Low Back Pain, 2002; Montreal.
11. Dozois DJA, Dobson KS, Wong M, Hughes D, Long A. Factors associated with rehabilitation outcome in patients with low back pain (LBP): prediction of employment outcome at 9-month follow-up. *Rehabil Psychol* 1995;40(4):243-59.
12. Severeijns R, Vlaeyen JW, van den Hout MA, Weber WE. Pain catastrophizing predicts pain intensity, disability, and psychological distress independent of the level of physical impairment. *Clin J Pain* 2001;17(2):165-72.
13. Nickel R, Egle UT, Eysel P, Rompe JD, Zollner J, Hoffmann SO. Health-related quality of life and somatization in patients with long-term low back pain: a prospective study with 109 patients. *Spine* 2001;26(20):2271-7.
14. Shutty MS Jr, DeGood DE, Schwartz DP. Psychological dimensions of distress in chronic pain patients: a factor analytic study of Symptom Checklist-90 responses. *J Consult Clin Psychol* 1986;54(6):836-42.

15. Waddell G, Newton M, Henderson I, Somerville D, Main C. A fear-avoidance beliefs questionnaire (FABQ) and the role of fear-avoidance beliefs in chronic low back pain and disability. *Pain* 1993;52:157-68.
16. Jacob T, Baras M, Zeev A, Epstein L. Low back pain: reliability of a set of pain measurement tools. *Arch Phys Med Rehabil* 2001;82(6):735-42.
17. Karasek RA. *Job Content Questionnaire and user's guide*. Los Angeles: Department of Industrial and System Engineering, University of Southern California; 1985.
18. Brisson C, Blanchette C, Guimont C, Dionne G, Moisan J, Vézina M. Reliability and validity of the French version of the 18-item Karasek Job Content Questionnaire. *Work Stress* 1998;12(4):322-36.
19. Bigos SJ, Battie MC, Spengler DM, Fisher LD, Fordyce WE, Hansson TH, et al. A prospective study of work perceptions and psychosocial factors affecting the report of back injury [published erratum appears in *Spine* 1991;16(6):688]. *Spine* 1991;16(1):1-6.
20. Friedrich M, Cermak T, Heiller I. Spinal troubles in sewage workers: epidemiological data and work disability due to low back pain. *Int Arch Occup Environ Health* 2000;73(4):245-54.
21. Reigo T, Tropp H, Timpka T. Absence of back disorders in adults and work-related predictive factors in a 5-year perspective. *Eur Spine J* 2001;10(3):215-20; discussion 221.
22. Williams DA, Feuerstein M, Durbin D, Pezzullo J. Health care and indemnity costs across the natural history of disability in occupational low back pain. *Spine* 1998;23(21):2329-36.
23. Williams RA, Pruitt SD, Doctor JN, Epping-Jordan JE, Wahlgren DR, Grant I, et al. The contribution of job satisfaction to the transition from acute to chronic low back pain. *Arch Phys Med Rehabil* 1998;79(4):366-74.
24. Loisel P, Durand P, Gosselin L, Simard R, Turcotte J, editors. *La clinique des maux de dos — un modèle de prise en charge en prévention de la chronicité*. Québec: Institut de recherche en santé et en sécurité du travail du Québec; mai 1996.
25. Siegrist J, Starke D, Chandola T, Godin I, Marmot M, Niedhammer I, et al. The measurement of effort-reward imbalance at work: European comparisons. *Soc Sci Med* 2004;58(8):1483-99.
26. Niedhammer I, Siegrist J, Landre MF, Goldberg M, Leclerc A. [Psychometric properties of the French version of the Effort-Reward Imbalance model]. *Rev Epidemiol Sante Publique* 2000;48(5):419-37.
27. Cherkin D, Deyo RA, Berg AO, Bergman JJ, Lishner DM. Evaluation of a physician education intervention to improve primary care for low-back pain. I. Impact on physicians. *Spine* 1991;16(10):1168-72.
28. Von Korff M, Barlow W, Cherkin D, Deyo RA. Effects of practice style in managing back pain. *Ann Intern Med* 1994;121(3):187-95.
29. Rosenstiel AK, Keefe FJ. The use of coping strategies in chronic low back pain patients: relationship to patient characteristics and current adjustment. *Pain* 1983;17(1):33-44.
30. Cedraschi C, Nordin M, Nachemson AL, Vischer TL. Health care providers should use a common language in relation to low back pain patients. *Baillieres Clin Rheumatol* 1998;12:1-15.
31. Bandura A. Self-efficacy: toward a unifying theory of behavioral change. *Psychol Rev* 1977;84(2):191-215.
32. Wallston KA, Wallston BS, DeVellis R. Development of the Multidimensional Health Locus of Control (MHLC) Scales. *Health Educ Monogr* 1978;6(2):160-70.
33. Talbot F, Nouwen A, Gauthier J. Is health locus of control a 3-factor or a 2-factor construct? *J Clin Psychol* 1996;52(5):559-68.
